# Supplementary material
Source: HighWire-hosted journal article supplement (https://www.cancerbiomed.org/content/21/3/252)
Supplement: media-1 [file media-1.pdf]

# Supplementary materials

## Supplementary results

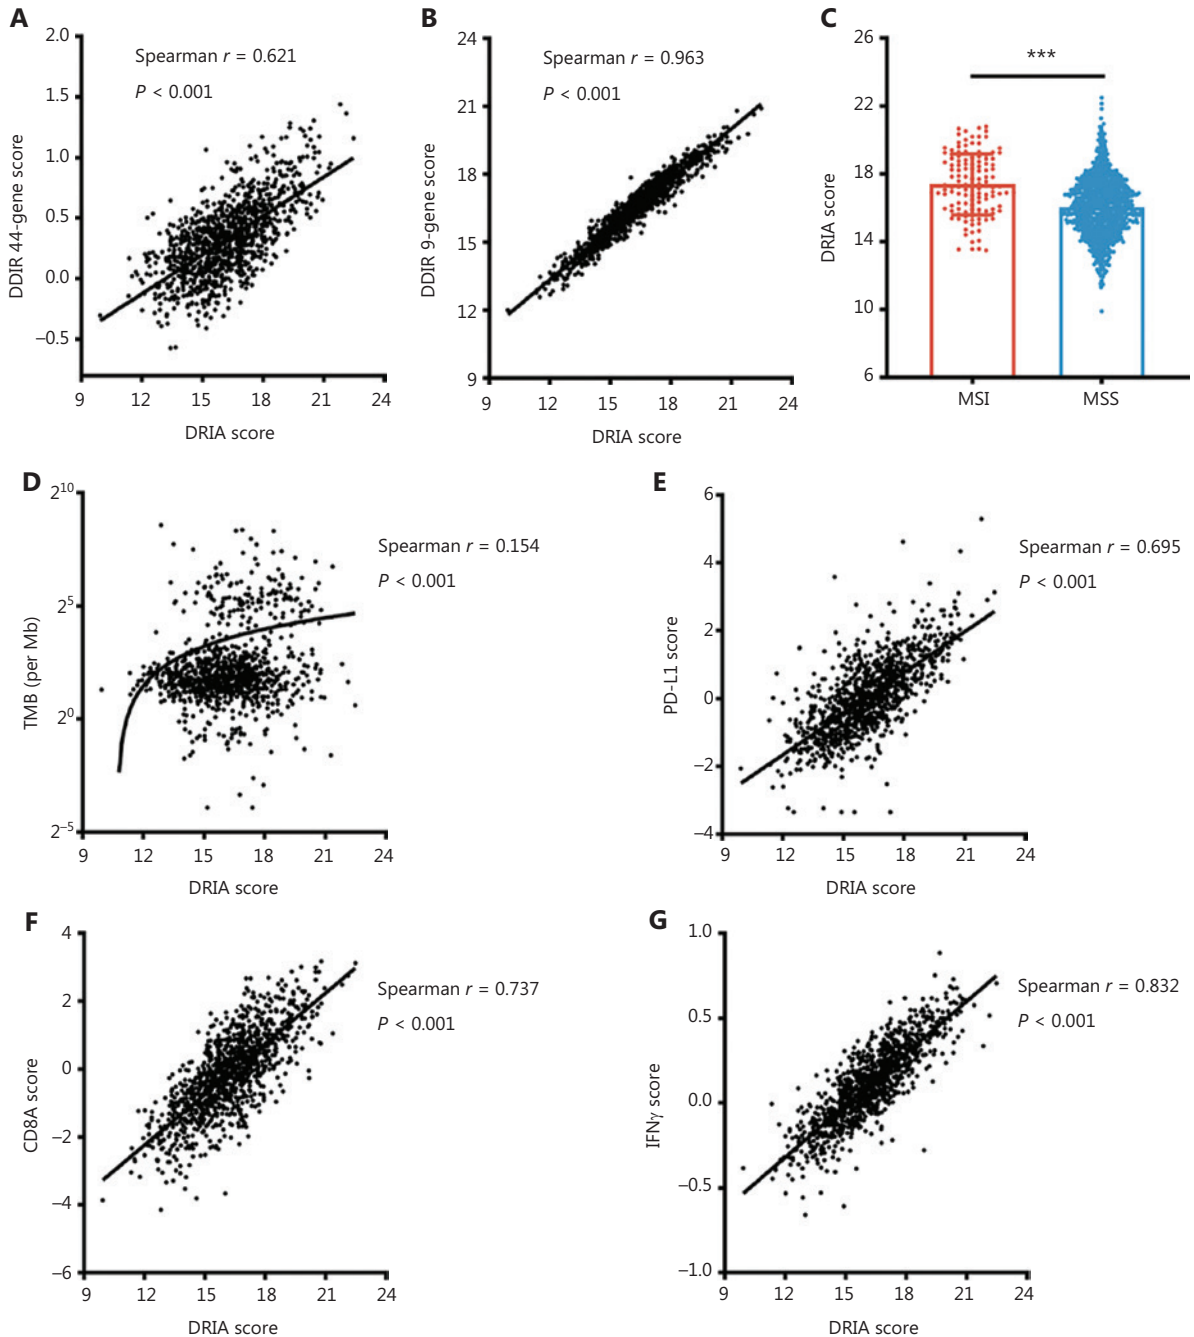

**Figure S1** Immune characteristics of DRIA in GI cancer. (A-B) Correlation of the DRIA score with DDIR 44- (A) and DDIR 9-gene scores (B) among GI cancer tissues from the TCGA cohort. (C) Comparison of the DRIA score according to MSI status. (D-G) Correlation of the DRIA score with the TMB level (D), PD-L1 score (E), CD8A score (F), and IFN- $\gamma$  score (G). DRIA, DNA damage response-related immune activation; GI, gastrointestinal; DDIR, DNA damage immune activation; MSI, microsatellite instability; MSS, microsatellite-stable; TMB, tumor mutational burden. \*\*\* $P < 0.001$ .

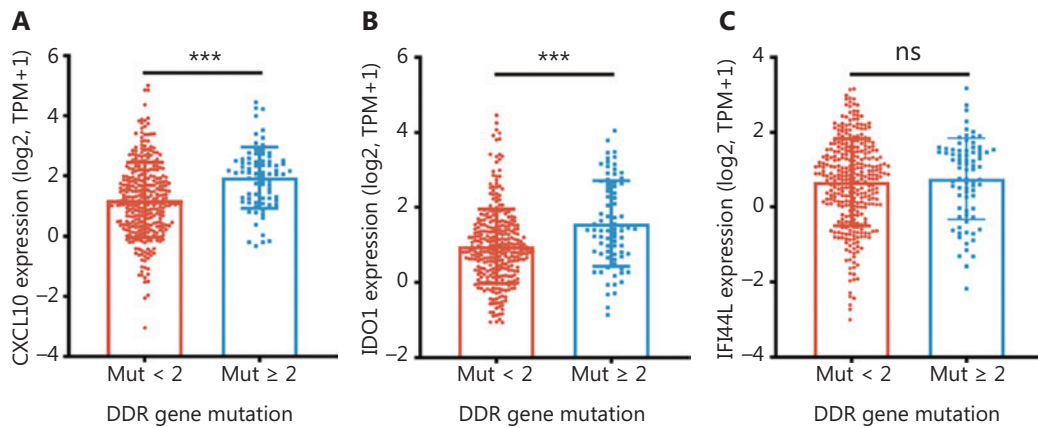

**Figure S2** Correlation of the expression of three genes with DDR gene mutations. (A-C) Comparison of the level of CXCL10 (A), IDO1 (B), and IFI44L expression (C) between patients with  $\geq 2$  and  $< 2$  DDR gene mutations in the TCGA-STAD cohort. DDR, DNA damage response. \*\*\* $P < 0.001$ ; ns,  $P > 0.05$ .

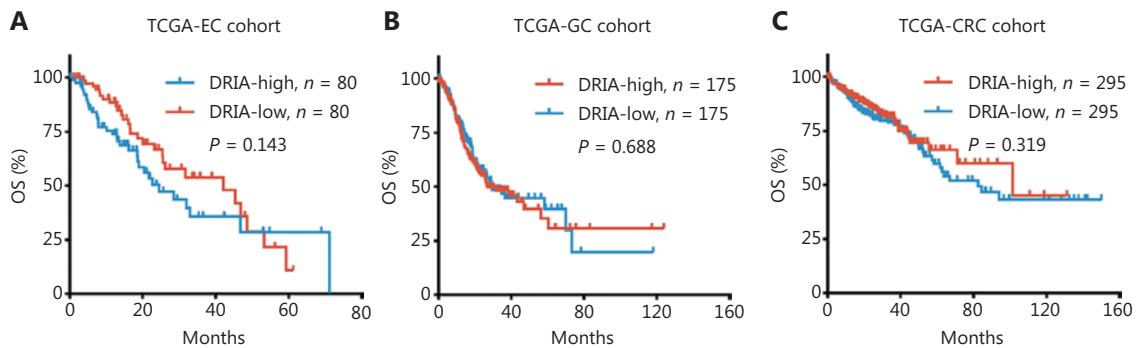

**Figure S3** Prognostic role of DRIA in GI cancer without ICI therapy. (A-C) Kaplan–Meier plots of OS segregated by DRIA score in patients with EC (A), GC (B), and CRC (C) from the TCGA cohort. DRIA, DNA damage response-related immune activation; GI, gastrointestinal; ICI, immune checkpoint inhibitors; OS, overall survival; TCGA, The Cancer Genome Atlas; EC, esophageal cancer; GC, gastric cancer; CRC, colorectal cancer.

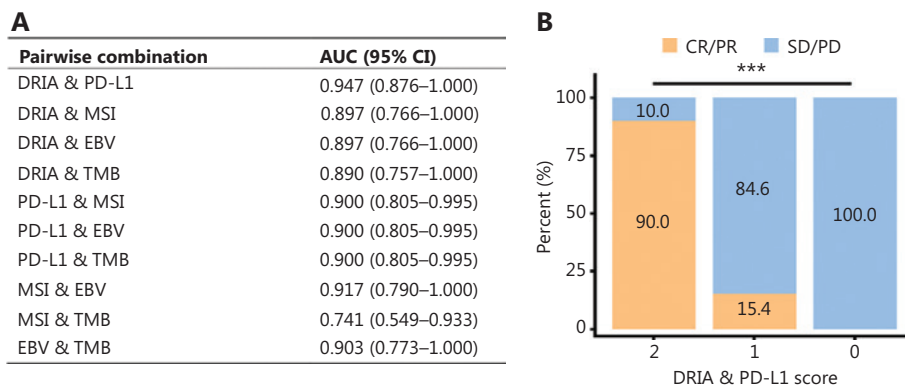

**Figure S4** Pairwise combination of DRIA and known clinical biomarkers for prediction of therapeutic response to ICI therapy in gastric cancer. (A) The predictive AUCs of pairwise combination of DRIA and known clinical biomarkers for response to ICI therapy in the Kim18-gastric cancer cohort. (B) Clinical response to ICI therapy by the DRIA and PD-L1 scores in the Kim18-gastric cancer cohort. DRIA, DNA damage response-related immune activation; ICIs, immune checkpoint inhibitors; AUC, area under the ROC curve; MSI, microsatellite instability; EBV, Epstein–Barr virus; TMB, tumor mutational burden; CR, complete response; PR, partial response; SD, stable disease; PD, progressive disease. \*\*\* $P < 0.001$ .

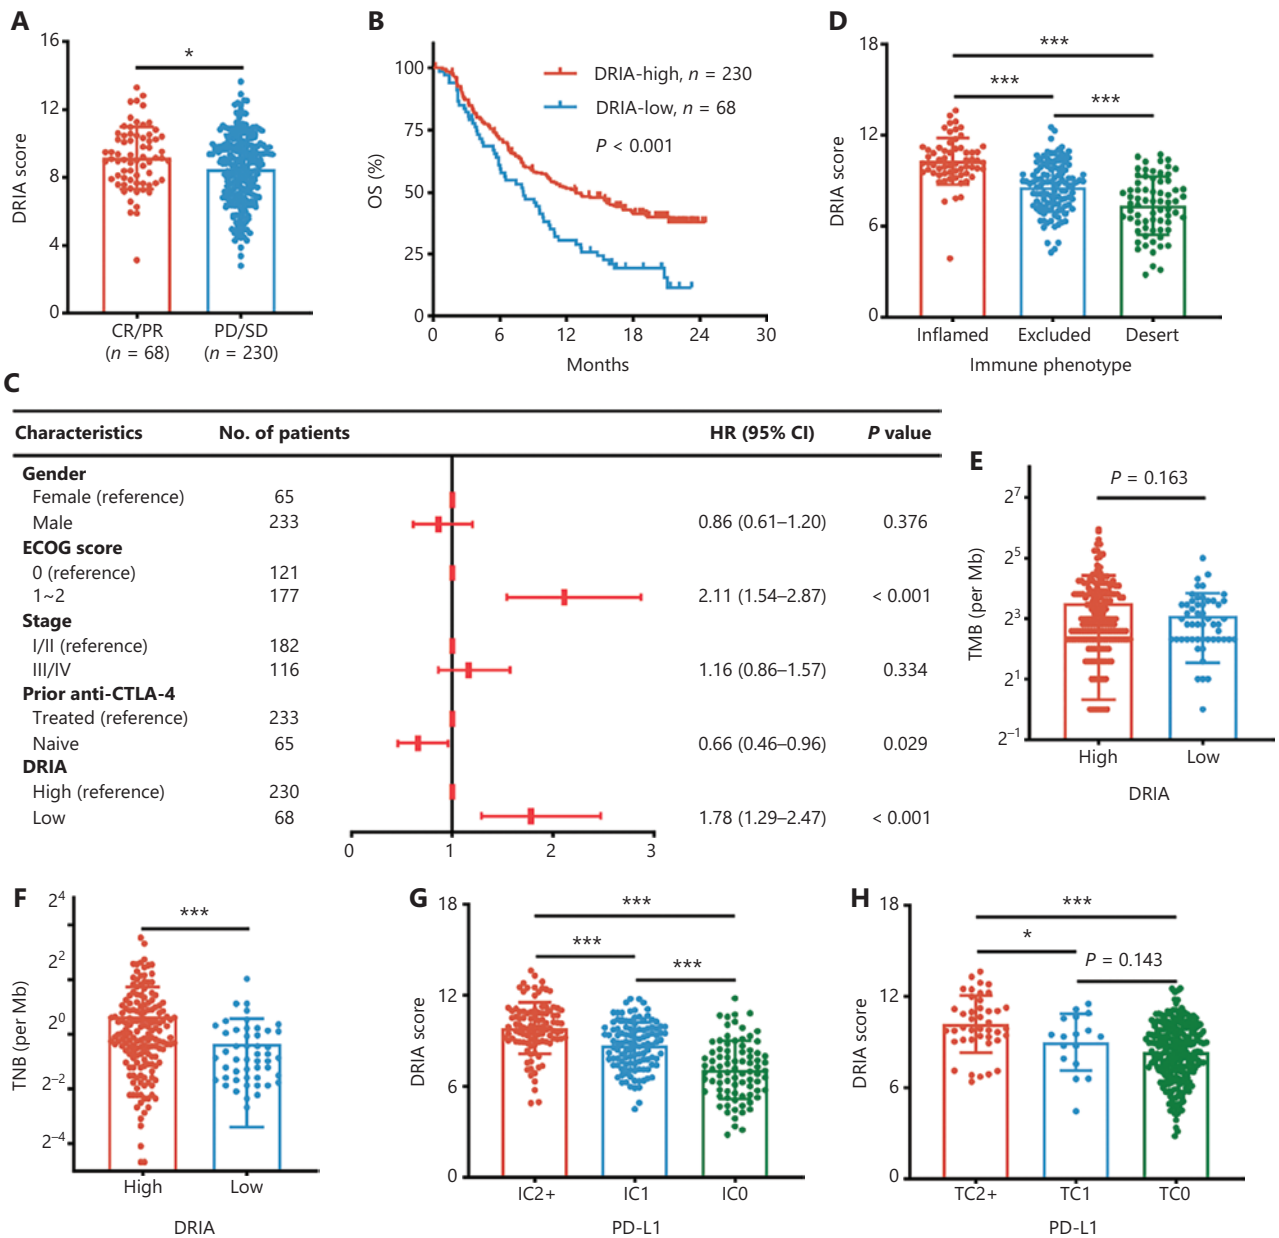

**Figure S5** Predictive performance of DRIA for clinical benefit from ICI therapy in the IMvigor210 urothelial cancer cohort. (A) Comparison of the DRIA score between responders and non-responders. (B) Kaplan–Meier survival curve comparing OS between DRIA-high and -low groups. (C) Multivariate Cox regression analyses of DRIA and clinicopathologic factors associated with OS. (D) Comparison of DRIA score between three classic immune phenotypes according to CD8+ T cell infiltration. (E-F) Comparison of TMB (E) and TNB (F) according to the DRIA status. (G-H) Comparison of the DRIA score between subgroups with different PD-L1 expression on tumor-infiltrating immune cells (G) and tumor cells (H). DRIA, DNA damage response-related immune activation; ICIs, immune checkpoint inhibitors; CR, complete response; PR, partial response; SD, stable disease; PD, progressive disease; OS, overall survival; TMB, tumor mutational burden; TNB, tumor neoantigen burden; IC, immune cell; TC, tumor cell. \*P < 0.05; \*\*\*P < 0.001.

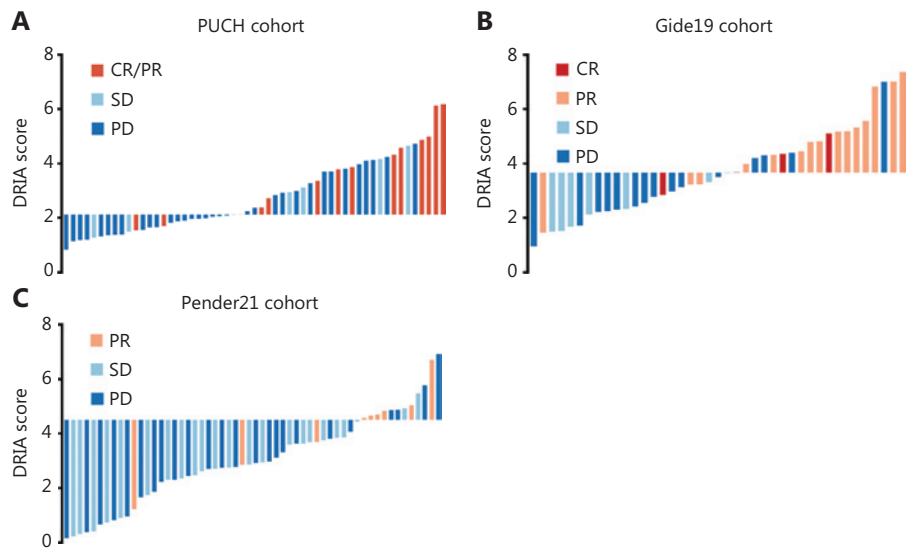

**Figure S6** Clinical responses to ICI therapy in the pan-cancer cohorts. (A-C) The DRIA scores of individual patients and the clinical responses to ICI therapy in PUCH melanoma (A), Gide19 melanoma (B), and Pender21 pan-cancer cohorts (C). DRIA, DNA damage response-related immune activation; CR, complete response; PR, partial response; SD, stable disease; PD, progressive disease; ICIs, immune checkpoint inhibitors.

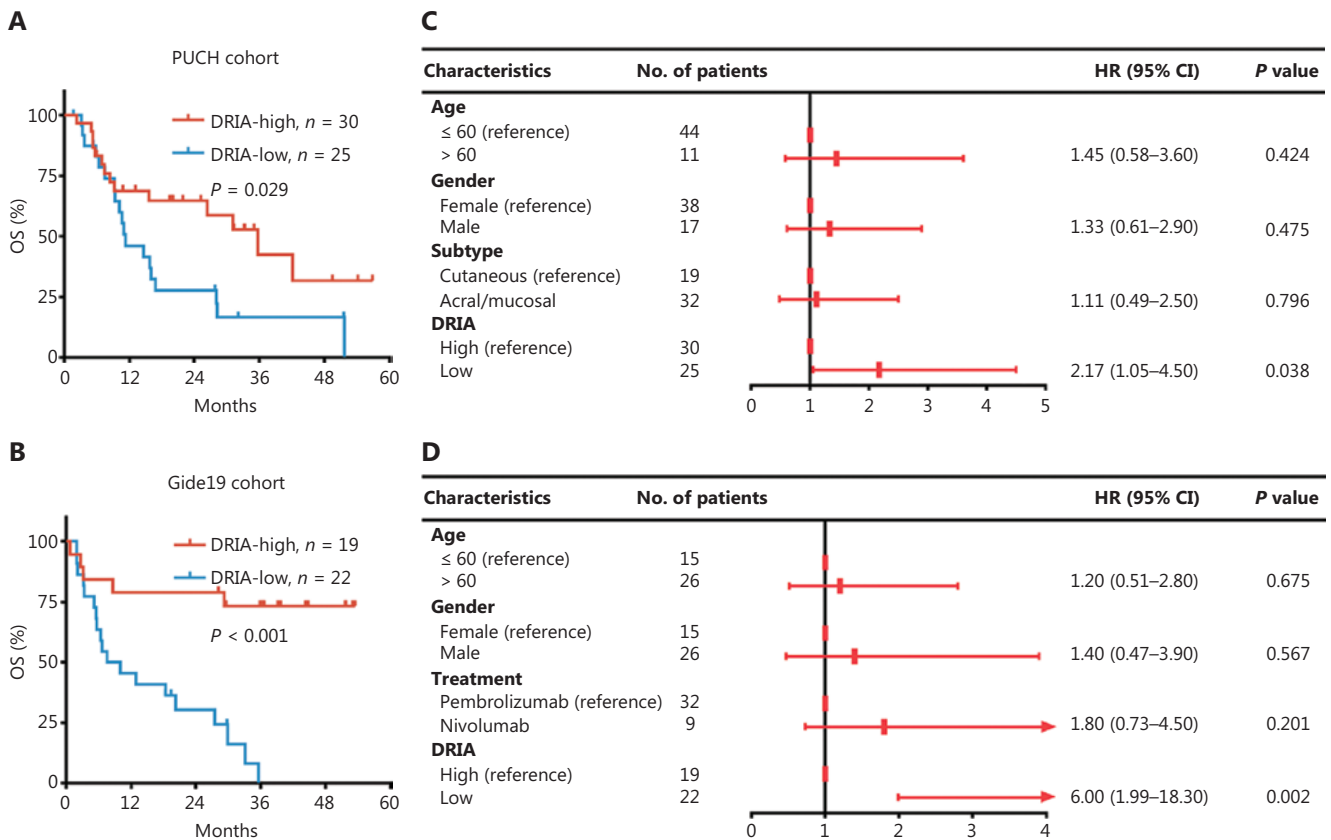

**Figure S7** Association between DRIA and OS in two melanoma immunotherapy cohorts. (A-B) Kaplan–Meier plots of OS segregated by DRIA score in PUCH melanoma (A) and Gide19 melanoma cohorts (B). (C-D) Multivariate Cox regression analyses of DRIA and clinicopathologic factors associated with OS in PUCH melanoma (C) and Gide19 melanoma cohorts (D). DRIA, DNA damage response-related immune activation; OS, overall survival; HR, hazard ratio; CI, confidence interval.

**Table S1** Data sources

| Cohort     | Tumor type                                      | Treatment                                   | N   | RNA-seq platform                    | Clinical outcome | Reference                         |
|------------|-------------------------------------------------|---------------------------------------------|-----|-------------------------------------|------------------|-----------------------------------|
| Kim18      | Gastric cancer                                  | Anti-PD-1 therapy                           | 45  | Illumina NextSeq 550                | ORR              | Nat Med. 2018; 24: 1449-58        |
| Parikh22   | MSS colorectal/<br>pancreatic<br>adenocarcinoma | Anti-PD-1+anti-CTLA-<br>4+radiation therapy | 22  | Illumina NextSeq 500                | ORR, PFS, OS     | Nat Cancer. 2021; 2: 1124-35      |
| Gide19     | Melanoma                                        | Anti-PD-1 therapy                           | 41  | Illumina HiSeq 2500                 | ORR, PFS, OS     | Cancer Cell. 2019; 35: 238-55.e6  |
| IMvigor210 | Urothelial cancer                               | Anti-PD-L1 therapy                          | 298 | Illumina HiSeq 2500                 | ORR, OS          | Nature. 2018; 554: 544-8          |
| Pender21   | Pan-cancer                                      | Anti-PD-(L)1 therapy                        | 56  | Illumina HiSeq 2500/<br>NextSeq 500 | ORR, PFS         | Clin Cancer Res. 2021; 27: 202-12 |

MSS, microsatellite-stable; ORR, objective response rate; PFS, progression-free survival; OS, overall survival.

**Table S2** Genes included in two reported DDIR signatures

| DDIR panel | Gene symbol | Weight          | Gene function                                  |
|------------|-------------|-----------------|------------------------------------------------|
| 44-gene    | CXCL10      | 0.023           | Immune response                                |
|            | MX1         | 0.0226          | Immune response                                |
|            | IDO1        | 0.0221          | Immune response                                |
|            | IFI44L      | 0.0191          | Immune response                                |
|            | CD2         | 0.019           | Immune response                                |
|            | GBP5        | 0.0181          | Immune response                                |
|            | PRAME       | 0.0177          | Cell proliferation differentiation and mitosis |
|            | ITGAL       | 0.0176          | Immune response                                |
|            | LRP4        | -0.0159         | Cell adhesion and cell signaling               |
|            | APOL3       | 0.0151          | Lipid transport and localization               |
|            | CDR1        | -0.0149         | Immune response                                |
|            | FYB         | 0.0149          | Cell proliferation and adhesion                |
|            | TSPAN7      | -0.0148         | Signal transduction, growth and motility       |
|            | RAC2        | 0.0148          | Signal transduction, growth and motility       |
|            | KLHDC7B     | 0.014           | Protein binding                                |
|            | GRB14       | 0.0137          | Signal transduction, growth and metabolism     |
|            | AC138128.1  | -0.0136         | Unreported                                     |
|            | KIF26A      | -0.0136         | Transport and signaling                        |
|            | CD274       | 0.0133          | Immune response                                |
|            | CD109       | -0.0129         | Immune response                                |
|            | ETV7        | 0.0124          | Transcriptional regulation                     |
|            | MFAP5       | -0.0121         | ECM remodeling                                 |
|            | OLFM4       | -0.0117         | Mediates cell-adhesion                         |
| PI15       | -0.0115     | Proteolysis     |                                                |
| FOSB       | -0.0111     | Immune response |                                                |

Table S2 Continued

| DDIR panel | Gene symbol | Weight  | Gene function                              |
|------------|-------------|---------|--------------------------------------------|
|            | FAM19A5     | -0.011  | Immune response                            |
|            | NLRC5       | 0.0101  | Immune response                            |
|            | PRICKLE1    | -0.0089 | Nuclear trafficking                        |
|            | EGR1        | -0.0086 | Transcriptional regulation                 |
|            | CLDN10      | -0.0086 | Cell adhesion                              |
|            | ADAMTS4     | -0.0085 | Proteolysis                                |
|            | SP140L      | 0.0084  | DNA, protein and metal ion binding         |
|            | ANXA1       | -0.0082 | Immune response                            |
|            | RSAD2       | 0.0081  | Immune response                            |
|            | ESR1        | 0.0079  | Transcriptional regulation                 |
|            | IKZF3       | 0.0073  | Immune response                            |
|            | OR2I1P      | 0.007   | Olfactory receptor activity                |
|            | EGFR        | -0.0066 | Proliferation and apoptosis                |
|            | NAT1        | 0.0065  | Metabolism                                 |
|            | LATS2       | -0.0063 | Proliferation and mitosis                  |
|            | CYP2B6      | 0.0061  | Metabolism                                 |
|            | PTPRC       | 0.0051  | Proliferation, differentiation and mitosis |
|            | PPP1R1A     | -0.0041 | Potentiation and meiosis                   |
|            | AL137218.1  | -0.0017 | Unreported                                 |
| 9-gene     | CCL5        | -       | Immune response                            |
|            | CXCL10      | -       | Immune response                            |
|            | CXCL9       | -       | Immune response                            |
|            | GABBR1      | -       | Signal transduction, growth and metabolism |
|            | IDO1        | -       | Immune response                            |
|            | IFI44L      | -       | Immune response                            |
|            | IFIT1       | -       | Immune response                            |
|            | OAS2        | -       | Immune response                            |
|            | SLAMF7      | -       | Immune response                            |

**Table S3** The DNA damage response and repair gene panel

| MMR  | NER   | HR     | FA     | Checkpoint | Others |
|------|-------|--------|--------|------------|--------|
| MLH1 | ERCC2 | BRCA1  | BRCA2  | ATM        | POLE   |
| MSH2 | ERCC3 | MRE11A | BRIP1  | ATR        | MUTYH  |
| MSH6 | ERCC4 | NBN    | FANCA  | CHEK1      | PARP1  |
| PMS1 | ERCC5 | RAD50  | FANCC  | CHEK2      | RECQL4 |
| PMS2 |       | RAD51  | PALB2  | MDC1       |        |
|      |       | RAD51B | RAD51C |            |        |
|      |       | RAD51D | BLM    |            |        |
|      |       | RAD52  |        |            |        |
|      |       | RAD54L |        |            |        |

MMR, mismatch repair; NER, nucleotide excision repair; HR, homologous recombination; FA, Fanconi anemia.

**Table S4** Published immune-related gene signatures used in the current study

| Signature name        | Genes                                                                                                                             | Reference                                     |
|-----------------------|-----------------------------------------------------------------------------------------------------------------------------------|-----------------------------------------------|
| Cytolytic activity    | GZMA, PRF1                                                                                                                        | Cell. 2015; 160: 48-61                        |
| 13 T-cell signature   | CD8A, CCL2, CCL3, CCL4, CXCL9, CXCL10, ICOS, GZMK, IRF1, HLA-DMA, HLA-DMB, HLA-DOA, HLA-DOB                                       | Proc Natl Acad Sci U S A. 2016; 113: E7759-68 |
| TLS                   | CCL2, CCL3, CCL4, CCL5, CCL8, CCL18, CCL19, CCL21, CXCL9, CXCL10, CXCL11, CXCL13                                                  | Sci Rep. 2012; 2: 765                         |
| 18-gene IFN signature | CD3D, IDO1, CIITA, CD3E, CCL5, GZMK, CD2, HLA-DRA, CXCL13, IL2RG, NKG7, HLA-E, CXCR6, LAG3, TAGAP, CXCL10, STAT1, GZMB            | J Clin Invest. 2017; 127: 2930-40             |
| T-cell inflamed GEP   | CCL5, CD27, CD274, CD276, CD8A, CMKLR1, CXCL9, CXCR6, HLA-DQA1, HLA-DRB1, HLA-E, IDO1, LAG3, NKG7, PDCD1LG2, PSMB10, STAT1, TIGIT | Science. 2018; 362: eaar3593                  |
| Teff gene signature   | CD8A, EOMES, PRF1, IFNG, CD274                                                                                                    | Nat Med. 2018; 24: 749-57                     |
| Immune checkpoint     | CD274, CTLA4, HAVCR2, LAG3, PDCD1, PDCD1LG2, TIGIT                                                                                | Lancet Oncol. 2020; 21: 283-93                |

TLS, tertiary lymphoid structures; IFN, interferon; GEP, gene expression profiling.

**Table S5** Clinical baseline characteristics of six immunotherapy cohorts included in the current study

| Patient characteristic              | Kim18          | Parikh22                     | PUCH       | Gide19     | IMvigor210        | Pender21     |
|-------------------------------------|----------------|------------------------------|------------|------------|-------------------|--------------|
| Tumor type                          | Gastric cancer | Colorectal/pancreatic cancer | Melanoma   | Melanoma   | Urothelial cancer | Pan-cancer   |
| No. of patients                     | 45             | 22                           | 55         | 41         | 298               | 56           |
| Median age in yrs (range)           | -              | -                            | 51 (27–72) | 66 (37–90) | -                 | 56.5 (25–86) |
| Gender, <i>n</i> (%)                |                |                              |            |            |                   |              |
| Male                                | -              | -                            | 17 (30.9)  | 26 (63.4)  | 233 (78.2)        | 25 (44.6)    |
| Female                              | -              | -                            | 38 (69.1)  | 15 (36.6)  | 65 (21.8)         | 31 (55.4)    |
| Race, <i>n</i> (%)                  |                |                              |            |            |                   |              |
| Yellow                              | 45 (100)       | -                            | 55 (100)   | -          | 7 (2.3)           | -            |
| White                               | -              | -                            | -          | -          | 270 (90.6)        | -            |
| Black                               | -              | -                            | -          | -          | 9 (3.0)           | -            |
| Other                               | -              | -                            | -          | -          | 12 (4.0)          | -            |
| Previous ICI, <i>n</i> (%)          |                |                              |            |            |                   |              |
| Naïve                               | 45 (100)       | -                            | -          | -          | 298 (100)         | 46 (82.1)    |
| Treated                             | -              | -                            | -          | -          | -                 | 10 (17.9)    |
| Treatment, <i>n</i> (%)             |                |                              |            |            |                   |              |
| Anti-PD-1                           | 45 (100)       | -                            | 55 (100)   | 41 (100)   | -                 | 44 (78.6)    |
| Anti-PD-L1                          | -              | -                            | -          | -          | 298 (100)         | 12 (21.4)    |
| Anti-PD-1 & anti-CTLA-4             | -              | 22 (100)                     | -          | -          | -                 | -            |
| Best overall response, <i>n</i> (%) |                |                              |            |            |                   |              |
| CR                                  | 3 (6.7)        | 1 (4.5)                      | 1 (1.8)    | 4 (9.8)    | 25 (8.4)          | 0 (0)        |
| PR                                  | 9 (20.0)       | 2 (9.1)                      | 13 (23.6)  | 15 (36.6)  | 43 (14.4)         | 9 (16.1)     |
| SD                                  | 15 (33.3)      | 1 (4.5)                      | 6 (10.9)   | 6 (14.6)   | 63 (21.1)         | 23 (41.1)    |
| PD                                  | 18 (40.0)      | 11 (50.0)                    | 35 (63.6)  | 16 (39.0)  | 167 (56.0)        | 24 (42.9)    |
| NE                                  | -              | 7 (31.8)                     | -          | -          | -                 | -            |
| Median PFS (months)                 | -              | 2.5                          | 3.8        | 9.0        | -                 | 4.7          |
| Median OS (months)                  | -              | 6.4                          | 28.1       | 29.3       | 10.6              | 13.4         |

ICI, immune checkpoint inhibitors; CR, complete response; PR, partial response; SD, stable disease; PD, progressive disease; NE, not evaluated; PFS, progression-free survival; OS, overall survival.



**Table S6** Predictive performance of DRIA and two previously reported DDIR signatures for response to ICI therapy in five immunotherapy cohorts

| Cohort   | AUC (95% CI)        |                     |                     |
|----------|---------------------|---------------------|---------------------|
|          | DRIA                | 9-gene DDIR         | 44-gene DDIR        |
| Kim18    | 0.838 (0.680–0.997) | 0.818 (0.649–0.988) | 0.881 (0.749–1.000) |
| Parikh22 | 0.806 (0.580–1.000) | 0.833 (0.612–1.000) | 0.694 (0.419–0.970) |
| PUCH     | 0.760 (0.612–0.907) | 0.782 (0.630–0.935) | 0.775 (0.645–0.905) |
| Gide19   | 0.845 (0.715–0.974) | 0.854 (0.727–0.981) | 0.813 (0.671–0.956) |
| Pender21 | 0.766 (0.596–0.936) | 0.738 (0.553–0.922) | 0.780 (0.632–0.929) |

DRIA, DNA damage response (DDR)-related immune activation; DDIR, DNA damage immune activation; ICIs, immune checkpoint inhibitors; AUC, area under the ROC curve; CI, confidence interval.
